# Supplementary material for: Pelagic Sargassum community change over a 40-year period: temporal and spatial variability
Source: PubMed Central journal article supplement (PMC4231207; doi:10.1007/s00227-014-2539-y), 2014-09-14
Supplement: 227_2014_2539_MOESM1_ESM.pdf [file 227_2014_2539_MOESM1_ESM.pdf]

**Supplementary Table 1.** Stations analyzed in this study, along with site location and data source. Note sites <70 ml DV were not included in analyses.

Pelagic *Sargassum* community change over a 40-year period: temporal and spatial variability. *Marine Biology* C. L. Huffard\*, S. von Thun, A. D. Sherman, K. Sealey, K. L. Smith, Jr.

\*Corresponding author: Monterey Bay Aquarium Research Institute, 7700 Sandholdt Rd, Moss Landing, CA 95039; [chuffard@mbari.org](mailto:chuffard@mbari.org), phone: +1-831-775-1839, fax: (831) 775-1620

| <b>Cruise</b>   | <b>Year</b> | <b>Season</b> | <b>Sample code</b> | <b>Latitude</b> | <b>Longitude</b> | <b>Data source</b>             |
|-----------------|-------------|---------------|--------------------|-----------------|------------------|--------------------------------|
| Weis            | 1966        | 4             | Weis               | 34.2            | -75.82           | Weis, 1968                     |
| Fine            | 1969        | 3             | Fine 1             | 34.35           | -75.6            | Fine, 1970; Butler et al, 1983 |
| Fine            | 1969        | 3             | Fine 1a            | 33.81           | -73.54           | Fine, 1970; Butler et al, 1983 |
| Fine            | 1969        | 3             | Fine 2             | 33.93           | -74.45           | Fine, 1970; Butler et al, 1983 |
| Fine            | 1969        | 3             | Fine 3             | 33.53           | -72.62           | Fine, 1970; Butler et al, 1983 |
| Fine            | 1969        | 3             | Fine 4             | 33.43           | -71.93           | Fine, 1970; Butler et al, 1983 |
| Fine            | 1969        | 3             | Fine 5             | 33.25           | -71.02           | Fine, 1970; Butler et al, 1983 |
| Hysdostation S  | 1971        | 3             | HS-346             | 32.17           | -64.5            | Butler et al., 1983            |
| Hysdostation S  | 1971        | 3             | HS-347             | 32.17           | -64.5            | Butler et al., 1983            |
| Hysdostation S  | 1971        | 3             | HS-348             | 32.17           | -64.5            | Butler et al., 1983            |
| Hysdostation S  | 1971        | 3             | HS-349             | 32.17           | -64.5            | Butler et al., 1983            |
| Hysdostation S  | 1971        | 4             | HS-353             | 32.17           | -64.5            | Butler et al., 1983            |
| Hysdostation S  | 1971        | 4             | HS-354             | 32.17           | -64.5            | Butler et al., 1983            |
| Hysdostation S  | 1971        | 4             | HS-355             | 32.17           | -64.5            | Butler et al., 1983            |
| Hysdostation S  | 1972        | 1             | HS-356             | 32.17           | -64.5            | Butler et al., 1983            |
| Hysdostation S  | 1972        | 1             | HS-373             | 32.17           | -64.5            | Butler et al., 1983            |
| Hysdostation S  | 1972        | 1             | HS-374             | 32.17           | -64.5            | Butler et al., 1983            |
| Sir Horace Lamb | 1972        | 1             | SHL-1              | 29.17           | -63.75           | Butler et al., 1983            |
| Sir Horace Lamb | 1972        | 1             | SHL-2              | 28.22           | -63.5            | Butler et al., 1983            |
| Sir Horace Lamb | 1972        | 1             | SHL-3              | 24.72           | -62.48           | Butler et al., 1983            |
| Sir Horace Lamb | 1972        | 1             | SLH-4              | 21.83           | -61.8            | Butler et al., 1983            |
| Sir Horace Lamb | 1972        | 1             | SHL-5              | 23              | -62.77           | Butler et al., 1983            |
| Sir Horace Lamb | 1972        | 1             | SLH-6              | 21.92           | -61.55           | Butler et al., 1983            |
| Sir Horace Lamb | 1972        | 1             | SLH-7              | 18.24           | -62.88           | Butler et al., 1983            |
| Sir Horace Lamb | 1972        | 1             | SLH-8              | 18.11           | -62.75           | Butler et al., 1983            |
| Sir Horace Lamb | 1972        | 1             | SLH-9              | 18.33           | -60.78           | Butler et al., 1983            |
| Hysdostation S  | 1972        | 2             | HS-358             | 32.17           | -64.5            | Butler et al., 1983            |
| Hysdostation S  | 1972        | 2             | HS-360             | 32.17           | -64.5            | Butler et al., 1983            |
| Hysdostation S  | 1972        | 2             | HS-361             | 32.17           | -64.5            | Butler et al., 1983            |
| Hysdostation S  | 1972        | 3             | HS-364             | 32.17           | -64.5            | Butler et al., 1983            |
| Hysdostation S  | 1972        | 3             | HS-365             | 32.17           | -64.5            | Butler et al., 1983            |
| Hysdostation S  | 1972        | 3             | HS-366             | 32.17           | -64.5            | Butler et al., 1983            |
| Westward-72     | 1972        | 3             | W-1                | 32.67           | -63              | Butler et al., 1983            |
| Westward-72     | 1972        | 3             | W-2                | 33.42           | -59.75           | Butler et al., 1983            |
| Westward-72     | 1972        | 3             | W-3                | 33.58           | -57.33           | Butler et al., 1983            |

|                |      |   |          |       |        |                     |
|----------------|------|---|----------|-------|--------|---------------------|
| Westward-72    | 1972 | 3 | W-4      | 38.42 | -50.25 | Butler et al., 1983 |
| Westward-72    | 1972 | 3 | W-5      | 35.6  | -45.05 | Butler et al., 1983 |
| Halifax        | 1972 | 4 | D-22     | 44.5  | -62.5  | Butler et al., 1983 |
| Halifax        | 1972 | 4 | D-23     | 44.5  | -62.5  | Butler et al., 1983 |
| Hysdostation S | 1972 | 4 | HS-367   | 32.17 | -64.5  | Butler et al., 1983 |
| Hysdostation S | 1972 | 4 | HS-368   | 32.17 | -64.5  | Butler et al., 1983 |
| Hysdostation S | 1972 | 4 | HS-369   | 32.17 | -64.5  | Butler et al., 1983 |
| Hysdostation S | 1972 | 4 | HS-370   | 32.17 | -64.5  | Butler et al., 1983 |
| Hysdostation S | 1972 | 4 | HS-371   | 32.17 | -64.5  | Butler et al., 1983 |
| Hysdostation S | 1972 | 4 | HS-372   | 32.17 | -64.5  | Butler et al., 1983 |
| Hysdostation S | 1973 | 1 | HS-375   | 32.17 | -64.5  | Butler et al., 1983 |
| Hysdostation S | 1973 | 1 | HS-376   | 32.17 | -64.5  | Butler et al., 1983 |
| Hysdostation S | 1973 | 1 | HS-377   | 32.17 | -64.5  | Butler et al., 1983 |
| Hysdostation S | 1973 | 2 | HS-378   | 32.17 | -64.5  | Butler et al., 1983 |
| Hysdostation S | 1973 | 2 | HS-380   | 32.17 | -64.5  | Butler et al., 1983 |
| Eastward       | 1973 | 3 | E-22317  | 28.42 | -71.38 | Butler et al., 1983 |
| Eastward       | 1973 | 3 | E-22319  | 29.64 | -69.7  | Butler et al., 1983 |
| Eastward       | 1973 | 3 | E-22310  | 29.87 | -69.43 | Butler et al., 1983 |
| Eastward       | 1973 | 3 | E-22310A | 29.87 | -69.43 | Butler et al., 1983 |
| Eastward       | 1973 | 3 | E-22312  | 27.93 | -70.03 | Butler et al., 1983 |
| Eastward       | 1973 | 3 | E-22313  | 27.5  | -70.63 | Butler et al., 1983 |
| Eastward       | 1973 | 3 | E-22321  | 28.52 | -69.17 | Butler et al., 1983 |
| Eastward       | 1973 | 3 | E-22324  | 29.82 | -71.42 | Butler et al., 1983 |
| Eastward       | 1973 | 3 | E-22309  | 30.53 | -68.24 | Butler et al., 1983 |
| Eastward       | 1973 | 3 | E-22327  | 32.43 | -74.28 | Butler et al., 1983 |
| Eastward       | 1973 | 3 | E-22328  | 32.77 | -74.67 | Butler et al., 1983 |
| Hunt           | 1973 | 3 | Hunt-A   | 27.07 | -72.67 | Butler et al., 1983 |
| Hunt           | 1973 | 3 | Hunt-B   | 26.18 | -75.78 | Butler et al., 1983 |
| Hunt           | 1973 | 3 | Hunt-C   | 27.12 | -72.67 | Butler et al., 1983 |
| Hunt           | 1973 | 3 | Hunt-1   | 28.97 | -69.65 | Butler et al., 1983 |
| Hunt           | 1973 | 3 | Hunt-1b  | 28.97 | -69.65 | Butler et al., 1983 |
| Hunt           | 1973 | 3 | Hunt-2   | 26.46 | -69.33 | Butler et al., 1983 |
| Hysdostation S | 1973 | 3 | HS-382   | 32.17 | -64.5  | Butler et al., 1983 |
| Hysdostation S | 1973 | 3 | HS-383   | 32.17 | -64.5  | Butler et al., 1983 |
| Hysdostation S | 1973 | 3 | HS-385   | 32.17 | -64.5  | Butler et al., 1983 |
| Hysdostation S | 1973 | 4 | HS-386   | 32.17 | -64.5  | Butler et al., 1983 |
| Hysdostation S | 1973 | 4 | HS-387   | 32.17 | -64.5  | Butler et al., 1983 |
| Hysdostation S | 1973 | 4 | HS-388   | 32.17 | -64.5  | Butler et al., 1983 |
| Hysdostation S | 1973 | 4 | HS-389   | 32.17 | -64.5  | Butler et al., 1983 |
| Hysdostation S | 1974 | 1 | HS-390   | 32.17 | -64.5  | Butler et al., 1983 |
| Hysdostation S | 1974 | 1 | HS-391   | 32.17 | -64.5  | Butler et al., 1983 |
| Hysdostation S | 1974 | 1 | HS-392   | 32.17 | -64.5  | Butler et al., 1983 |
| Westward 1974  | 1974 | 1 | W-25-Jan | 17.33 | -62.33 | Butler et al., 1983 |
| Westward 1974  | 1974 | 1 | W-8-Feb  | 18    | -67.5  | Butler et al., 1983 |
| Hysdostation S | 1974 | 2 | HS-393   | 32.17 | -64.5  | Butler et al., 1983 |

|                |               |     |           |       |        |                     |
|----------------|---------------|-----|-----------|-------|--------|---------------------|
| Hysdostation S | 1974          | 2   | HS-394    | 32.17 | -64.5  | Butler et al., 1983 |
| Westward 1974  | 1974          | 2   | W-8-Mar   | 16.65 | -84.63 | Butler et al., 1983 |
| Westward 1974  | 1974          | 2   | W-8 Mar-b | 16.65 | -84.78 | Butler et al., 1983 |
| Westward 1974  | 1974          | 2   | W-8 Mar-c | 16.67 | -84.93 | Butler et al., 1983 |
| Westward 1974  | 1974          | 2   | W-17 Mar  | 23.98 | -84.48 | Butler et al., 1983 |
| Westward 1974  | 1974          | 2   | W-24 Mar  | 24.18 | -79.8  | Butler et al., 1983 |
| Hysdostation S | 1975          | 1   | HS-398    | 32.17 | -64.5  | Butler et al., 1983 |
| Hysdostation S | 1975          | 1   | HS-399    | 32.17 | -64.5  | Butler et al., 1983 |
| Smith          | 2011-<br>2012 | 1   | S-1       | 31.91 | -64.04 | This study          |
| Smith          | 2011-<br>2012 | 1,3 | S-3       | 29.61 | -66.54 | This study          |
| Smith          | 2011-<br>2012 | 1,3 | S-6       | 25.5  | -71    | This study          |
| Smith          | 2011-<br>2012 | 1,3 | S-5       | 26.74 | -69.71 | This study          |
