# Supplementary material for: Pelagic Sargassum community change over a 40-year period: temporal and spatial variability
Source: PubMed Central journal article supplement (PMC4231207; doi:10.1007/s00227-014-2539-y), 2014-09-14
Supplement: 227_2014_2539_MOESM3_ESM.pdf [file 227_2014_2539_MOESM3_ESM.pdf]

**Supplementary Table 2.** Feeding categories assigned to mobile macrofauna. Where feeding modes could not be found for individual species, feeding categories were assigned based on published information about relatives where possible.

Pelagic *Sargassum* community change over a 40-year period: temporal and spatial variability. *Marine Biology* C. L. Huffard\*, S. von Thun, A. D. Sherman, K. Sealey, K. L. Smith, Jr.

\*Corresponding author: Monterey Bay Aquarium Research Institute, 7700 Sandholdt Rd, Moss Landing, CA 95039; [chuffard@mbari.org](mailto:chuffard@mbari.org), phone: +1-831-775-1839, fax: (831) 775-1620

| Taxon                                          | Feeding category   | Reference (direct or by extension from studies of relatives) |
|------------------------------------------------|--------------------|--------------------------------------------------------------|
| Xenacoelomorpha: acoela                        |                    |                                                              |
| <i>Heterochaerus sargassi</i>                  | unknown            |                                                              |
| Nemertea: Nematoda                             |                    |                                                              |
| Nematoode- unidentified                        | detritivore        | Kito 1982                                                    |
| Platyhelminthes: Polycladida                   |                    |                                                              |
| <i>Acerotisa notulata</i>                      | eats sessile fauna | Galleni et al. 1980                                          |
| <i>Chatziplana grubei</i>                      | eats sessile fauna | Galleni et al. 1980                                          |
| Platyhelminthes- unidentified                  | eats sessile fauna | Galleni et al. 1980                                          |
| Platyhelminthes: Seriata                       |                    |                                                              |
| <i>Polycladus</i> sp.                          | eats sessile fauna | Galleni et al. 1980                                          |
| Platyhelminthes: Polycladida                   |                    |                                                              |
| <i>Gnesioceros sargassicola</i>                | eats sessile fauna | Galleni et al. 1980                                          |
| Platyhelminthes: unidentified                  | unknown            |                                                              |
| Annelida: Phyllodocida                         |                    |                                                              |
| <i>Myrianida</i> sp.                           | detritivore        | Giangrande et al. 2000                                       |
| <i>Platynereis dumerilii</i>                   | herbivore          | Hay et al. 1988                                              |
| Polychaeta- unidentified                       | unknown            |                                                              |
| Annelida: Spionida                             |                    |                                                              |
| Spooinid worm- unidentified                    | detritivore        | Taghon et al. 1980                                           |
| Mollusca: Caenogastropoda                      |                    |                                                              |
| <i>Janthina janthina</i>                       | eats coelenterates | Bieri 1966                                                   |
| <i>Litiopa melanostoma</i>                     | unknown            | Butler et al. 1983                                           |
| Gastropod- unidentified                        | unknown            |                                                              |
| Mollusca: Littorinimorpha                      |                    |                                                              |
| <i>Rissoa</i> sp.                              | detritivore        | Wigham 1976                                                  |
| Mollusca: Mesogastropoda                       |                    |                                                              |
| <i>Bittium</i> sp.                             | herbivore          | Sureda et al. 2009                                           |
| Mollusca: Nudibranchia                         |                    |                                                              |
| <i>Corambe obscura</i>                         | eats sessile fauna | Zolotarev 1996                                               |
| <i>Cuthona</i> sp.                             | eats sessile fauna | Folino 1997                                                  |
| <i>Doto pygmaea</i>                            | eats sessile fauna | Lambert 1991                                                 |
| <i>Fiona pinnata</i>                           | eats sessile fauna | Bieri 1966                                                   |
| <i>Scyllaea pelagica</i>                       | eats sessile fauna | Thompson and Brown 1981                                      |
| <i>Spurilla neapolitana</i>                    | eats sessile fauna | Conklin and Mariscal 1977                                    |
| Nudibranch "B" <i>sensu</i> Butler et al. 1983 | eats sessile fauna | Lambert 1991                                                 |
| Nudibranch "D" <i>sensu</i> Butler et al. 1984 | eats sessile fauna | Lambert 1991                                                 |
| Nudibranch- unidentified                       | eats sessile fauna | Lambert 1991                                                 |

|                                    |                    |                                            |
|------------------------------------|--------------------|--------------------------------------------|
| Arthropoda: Amphipoda              |                    |                                            |
| <i>Ampithoe</i> spp.               | herbivore          | Skutch, 1926; Sotka 2003                   |
| <i>Biancolina</i> spp.             | herbivore          | McGrouther 1983                            |
| <i>Deutella incerta</i>            | detritivore        | Guerra-García and Tierno de Figueroa 2009  |
| <i>Gammarus</i> sp.                | herbivore          | Orav-Kotta et al. 2009                     |
| <i>Hemiaegina minuta</i>           | detritivore        | Guerra-García and Tierno de Figueroa 2009  |
| <i>Hyale</i> sp.                   | detritivore        | Sotka 2003                                 |
| <i>Sunamphitoe pelagica</i>        | herbivore          | Butler et al. 1983                         |
| Amphipod- unidentified             | detritivore        | Butler et al. 1983                         |
| Arthropoda: Copepoda               |                    |                                            |
| <i>Dactylopusia tisboides</i>      | detritivore        | Butler et al. 1983                         |
| Copepod- unidentified              | detritivore        | Butler et al. 1983                         |
| Arthropoda: Decapoda               |                    |                                            |
| <i>Leander tenuicornis</i>         | eats mobile fauna  | Butler et al. 1983; Johnson and Atema 1986 |
| <i>Hippolyte coerulescens</i>      | herbivore          | Zupo 2001                                  |
| <i>Latreutes fucorum</i>           | eats mobile fauna  | Butler et al. 1983; Johnson and Atema 1986 |
| <i>Portunus sayi</i>               | eats mobile fauna  | Butler et al. 1983                         |
| <i>Planes minutus</i>              | eats mobile fauna  | Butler et al. 1983; Frick et al. 2004      |
| <i>Toseuma carolinensis</i>        | eats sessile fauna | Main 1987                                  |
| Shrimp- unidentified               | unknown            |                                            |
| Arthropoda: Harpacticoida          |                    |                                            |
| <i>Scutellidium longicauda</i>     | herbivore          | Gunnill 1982                               |
| Arthropoda: Isopoda                |                    |                                            |
| <i>Bopyrus</i> sp.                 | parasite           | Dreyer and Wagele 2001                     |
| <i>Carpias minutus</i>             | detritivore        | Butler et al. 1983                         |
| <i>Cirolana</i> sp.                | detritivore        | Butler et al. 1983                         |
| <i>Grapsicepon</i> sp.             | parasite           | Markham 1977                               |
| <i>Idotea metallica</i>            | omnivore           | Gutow et al. 2006                          |
| <i>Probopyrinella latreuticola</i> | parasite           | Markham 1977                               |
| Isopod- unidentified               | unknown            |                                            |
| “Parasitic isopod”- unidentified   | parasite           | Butler et al. 1983                         |
| Arthropoda: Ostracoda              |                    |                                            |
| Ostracod- unidentified             | unknown            |                                            |
| Arthropoda: Pantopoda              |                    |                                            |
| <i>Anoplodactylus petiolatus</i>   | eats sessile fauna | Varoli 1994                                |
| <i>Endeis spinosa</i>              | detritivore        | Soler-Membrives et al. 2013                |
| Pycnogonida- unidentified          | unknown            |                                            |
| Arthropoda: Tanaidacea             |                    |                                            |
| <i>Zeuxo (Zeuxo) normani</i>       | herbivore          | Nakaoka 2002                               |
| Tenaoid- unknown                   | unknown            |                                            |
| Chordata: Thaliacea                |                    |                                            |
| <i>Salpa</i> sp.                   | eats phytoplankton | Andersen 1985                              |
| Chordata: Teleostei                |                    |                                            |
| <i>Balistes</i> sp.                | eats mobile fauna  | Turner and Rooker 2006                     |
| <i>Caranx</i> sp.                  | eats mobile fauna  | Casazza and Ross 2008                      |

|                               |                   |                              |
|-------------------------------|-------------------|------------------------------|
| <i>Diodon</i> sp.             | eats mobile fauna | Palmer 1979                  |
| <i>Histrio histrio</i>        | eats mobile fauna | Adams 1960                   |
| <i>Syngnathus typhle</i>      | eats mobile fauna | Casazza and Ross 2008        |
| <i>Stephanolepis hispidus</i> | eats mobile fauna | Clements and Livingston 1983 |
| Fish- unidentified            | unknown           |                              |

## References:

- Adams JA (1960) A contribution to the biology and postlarval development of the Sargassum Fish, *Histrio Histrio* (Linnaeus), with a Discussion of the *Sargassum* Complex. *Bulletin of Marine Science* 10: 55-82
- Andersen V (1985) Filtration and ingestion rates of *Salpa fusiformis* Cuvier (Tunicata: Thaliacea): Effects of size, individual weight and algal concentration. *Journal of experimental marine biology and ecology* 87: 13-29
- Bieri R (1966) Feeding preferences and rates of the snail, *Ianthina prolongata*, the barnacle, *Lepas anserifera*, the nudibranchs, *Glaucus atlanticus* and *Fiona pinnata*, and the food web in the marine neuston. *Publications of the Seto Marine Biological Laboratory* 14: 161-170
- Butler JN, Morris BF, Cadwallader J, Stoner AW (1983) Studies of *Sargassum* and the *Sargassum* community. Bermuda Biological Station for Research St Georges
- Casazza TL, Ross SW (2008) Fishes associated with pelagic Sargassum and open water lacking *Sargassum* in the Gulf Stream off North Carolina. *Fishery Bulletin* 106
- Clements WH, Livingston RJ (1983) Overlap and pollution-induced variability in the feeding habits of filefish (Pisces: Monacanthidae) from Apalachee Bay, Florida. *Copeia* 1983: 331-338 doi 10.2307/1444375
- Conklin EJ, Mariscal RN (1977) Feeding behavior, ceras structure, and nematocyst storage in the aeolid nudibranch, *Spurilla neapolitana* (Mollusca). *Bulletin of Marine Science* 27: 658-667
- Dreyer H, Wagele JW (2001) Parasites of crustaceans (Isopoda: Bopyridae) evolved from fish parasites: molecular and morphological evidence. *Zoology-Jena-* 103: 157-178
- Folino NC (1997) The role of prey mobility in the population ecology of the nudibranch *Cuthona nana* (Gastropoda: Opisthobranchia). *American Malacological Bulletin* 14: 17-26
- Frick MG, Williams KL, Bolten AB, Bjordal KA, Martins HR (2004) Diet and fecundity of Columbus crabs, *Planes minutus*, associated with oceanic-stage loggerhead sea turtles, *Caretta caretta*, and inanimate flotsam. *Journal of Crustacean Biology* 24: 350-355
- Galleni L, Tongiorgi P, Ferrero E, Salghetti U (1980) *Stylochus mediterraneus* (Turbellaria: Polycladida), predator on the mussel *Mytilus galloprovincialis*. *Marine Biology* 55: 317-326 doi 10.1007/BF00393784
- Giangrande A, Licciano M, Pagliara P (2000) The diversity of diets in Syllidae (Annelida: Polychaeta). *Cahiers de biologie marine* 41: 55-65
- Guerra-García J, Tierno de Figueroa J (2009) What do caprellids (Crustacea: Amphipoda) feed on? *Marine Biology* 156: 1881-1890 doi 10.1007/s00227-009-1220-3
- Gunnill FC (1982) Macroalgae as habitat patch islands for *Scutellidium lamellipes* (Copepoda: Harpacticoida) and *Ampithoe tea* (Amphipoda: Gammaridae). *Marine Biology* 69: 103-116 doi 10.1007/BF00396966
- Gutow L, Strahl J, Wiencke C, Franke H-D, Saborowski R (2006) Behavioural and metabolic adaptations of marine isopods to the rafting life style. *Marine biology* 149: 821-828
- Hay ME, Renaud PE, Fenical W (1988) Large mobile versus small sedentary herbivores and their resistance to seaweed chemical defenses. *Oecologia* 75: 246-252
- Johnson BR, Atema J (1986) Chemical stimulants for a component of feeding behavior in the common gulf-weed shrimp *Leander tenuicornis* (Say). *The Biological Bulletin* 170: 1-10

- Kito K (1982) Phytal marine nematode assemblage on *Sargassum confusum* Agardh, with reference to the structure and seasonal fluctuations Journal of the Faculty of Science Hokkaido University Series VI Zoology 23: 143-161
- Lambert WJ (1991) Coexistence of hydroid eating nudibranchs: do feeding biology and habitat use matter? The Biological Bulletin 181: 248-260
- Main KL (1987) Predator Avoidance in Seagrass Meadows: Prey Behavior, Microhabitat Selection, and Cryptic Coloration. Ecology 68: 170-180 doi 10.2307/1938817
- Markham JC (1977) Distribution and systematic review of the bopyrid isopod *Probopyrinella latreuticola* (Gissler, 1882). Crustaceana 33: 189-197 doi 10.2307/20103215
- McGrouther MA (1983) Comparison of feeding mechanisms in two intertidal gammarideans, *Hyale rupicola* (Haswell) and *Paracalliope australis* (Haswell) (Crustacea : Amphipoda). Marine and Freshwater Research 34: 717-726
- Nakaoka M (2002) Predation on seeds of seagrasses *Zostera marina* and *Zostera caulescens* by a tanaid crustacean *Zeuxo* sp. Aquatic Botany 72: 99-106
- Orav-Kotta H, Kotta J, Herkül K, Kotta I, Paalme T (2009) Seasonal variability in the grazing potential of the invasive amphipod *Gammarus tigrinus* and the native amphipod *Gammarus salinus* (Amphipoda: Crustacea) in the northern Baltic Sea. Biological Invasions 11: 597-608
- Palmer AR (1979) Fish predation and the evolution of gastropod shell sculpture: experimental and geographic evidence. Evolution: 697-713
- Skutch AF (1926) On the habits and ecology of the tube-building amphipod *Amphithoe rubricata* Montagu. Ecology 7: 481-502 doi 10.2307/1931173
- Soler-Membrives A, Arango CP, Cuadrado M, Munilla T (2013) Feeding biology of carnivore and detritivore Mediterranean pycnogonids. Journal of the Marine Biological Association of the United Kingdom 93: 635-643
- Sotka EE (2003) Genetic control of feeding preference in the herbivorous amphipod *Ampithoe longimana*. Marine Ecology Progress Series 256: 305-310
- Sureda A, Box A, Deudero S, Pons A (2009) Reciprocal effects of caulerpenyne and intense herbivorism on the antioxidant response of *Bittium reticulatum* and *Caulerpa taxifolia*. Ecotoxicology and Environmental Safety 72: 795-801 doi http://dx.doi.org/10.1016/j.ecoenv.2007.12.007
- Taghon GL, Nowell ARM, Jumars PA (1980) Induction of suspension feeding in spionid polychaetes by high particulate fluxes. Science 210: 562-564
- Thompson TE, Brown GH (1981) Biology and relationships of the nudibranch mollusc *Notobryon wardi* in South Africa, with a review of the Scyllaeidae. Journal of Zoology 194: 437-444 doi 10.1111/j.1469-7998.1981.tb04592.x
- Turner JP, Rooker JR (2006) Fatty acid composition of flora and fauna associated with *Sargassum* mats in the Gulf of Mexico. Marine Biology 149: 1025-1036
- Varoli FMF (1994) Feeding aspects of *Tanystylum isabellae* and *Anoplodactylus stictus* (Pantopoda). Revista Brasileira de Zoologia 11: 623-627
- Wigham GD (1976) Feeding and digestion in the marine prosobranch *Rissoa parva* (Da Costa). Journal of Molluscan Studies 42: 74-94
- Zolotarev V (1996) The Black Sea ecosystem changes related to the introduction of new mollusc species. Marine ecology 17: 227-236
- Zupo V (2001) Influence of diet on sex differentiation of *Hippolyte inermis* Leach (Decapoda: Natantia) in the field. Hydrobiologia 449: 131-140 doi 10.1023/A:1017553422113
